# Supplementary material
Source: PubMed Central journal article supplement (PMC137829)
Supplement: pnas_222373499_1.pdf [file pnas_222373499_1.pdf]

Table 1. Characteristic remanent magnetizations from Arctic lava units.

| <b>Blacknose Ridge</b> |                      |                      |     |                      |                      |     |               |
|------------------------|----------------------|----------------------|-----|----------------------|----------------------|-----|---------------|
| Lava Unit              | Lat. ( $^{\circ}$ N) | Lon. ( $^{\circ}$ E) | $N$ | Incl. ( $^{\circ}$ ) | Decl. ( $^{\circ}$ ) | $k$ | $\alpha_{95}$ |
| Kanguk Fm.             |                      |                      |     |                      |                      |     |               |
| BC-6                   | 79.24                | 267.55               | 6   | 65.0                 | 266.7                | 32  | 10.2          |
| BC-5                   | 79.24                | 267.55               | 4   | 77.7                 | 270.9                | 93  | 7.3           |
| BC-4b                  | 79.24                | 267.55               | 4   | 78.7                 | 267.4                | 162 | 5.5           |
| BC-4a                  | 79.24                | 267.56               | 4   | 74.9                 | 349.2                | 114 | 6.6           |
| BC-3                   | 79.24                | 267.56               | 7   | 69.6                 | 300.3                | 172 | 4.0           |
| BC-2                   | 79.24                | 267.56               | 4   | 75.9                 | 260.3                | 93  | 7.3           |
| BC-1*                  | 79.24                | 267.56               | 4   | 63.1                 | 339.6                | 94  | 7.2           |
| Hassel Fm.             |                      |                      |     |                      |                      |     |               |
| <b>Dragon Creek</b>    |                      |                      |     |                      |                      |     |               |
| Lava Unit              | Lat. ( $^{\circ}$ N) | Lon. ( $^{\circ}$ E) | $N$ | Incl. ( $^{\circ}$ ) | Decl. ( $^{\circ}$ ) | $k$ | $\alpha_{95}$ |
| Kanguk Fm.             |                      |                      |     |                      |                      |     |               |
| DC-2a                  | 79.39                | 267.82               | 6   | 65.0                 | 249.1                | 335 | 3.1           |
| DC-3                   | 79.39                | 267.82               | 17  | 75.9                 | 255.8                | 91  | 3.6           |
| DC-4                   | 79.39                | 267.83               | 11  | 81.5                 | 223.9                | 45  | 6.3           |
| DC-5                   | 79.39                | 267.83               | 12  | 84.4                 | 300.8                | 36  | 6.7           |
| DC-6                   | 79.39                | 267.83               | 6   | 77.4                 | 288.1                | 57  | 7.6           |
| DC-7                   | 79.39                | 267.83               | 12  | 74.4                 | 279.3                | 129 | 3.6           |
| DC-8                   | 79.39                | 267.83               | 12  | 73.7                 | 254.9                | 103 | 4.0           |
| DC-9                   | 79.39                | 267.83               | 12  | 81.9                 | 212.2                | 80  | 4.5           |
| DC-10*                 | 79.39                | 267.83               | 17  | 86.5                 | 78.1                 | 66  | 4.2           |
| DC-12a                 | 79.39                | 267.83               | 6   | 84.0                 | 37.3                 | 82  | 6.3           |
| DC-12b                 | 79.39                | 267.83               | 6   | 79.8                 | 60.1                 | 317 | 3.2           |
| DC-15a*                | 79.39                | 267.85               | 12  | 85.8                 | 251.7                | 488 | 1.8           |
| DC-15b                 | 79.39                | 267.85               | 12  | 85.7                 | 112.9                | 55  | 5.5           |
| DC-17*                 | 79.39                | 267.85               | 19  | 81.3                 | 64.1                 | 33  | 5.6           |
| Hassel Fm.             |                      |                      |     |                      |                      |     |               |
| <b>Agate Fiord</b>     |                      |                      |     |                      |                      |     |               |
| Lava Unit              | Lat. ( $^{\circ}$ N) | Lon. ( $^{\circ}$ E) | $N$ | Incl. ( $^{\circ}$ ) | Decl. ( $^{\circ}$ ) | $k$ | $\alpha_{95}$ |
| Kanguk Fm.             |                      |                      |     |                      |                      |     |               |
| AF-3                   | 79.45                | 266.84               | 10  | 57.5                 | 256.4                | 94  | 5.0           |
| AF-4                   | 79.45                | 266.84               | 11  | 65.2                 | 271.4                | 240 | 2.7           |
| AF-5                   | 79.45                | 266.84               | 6   | 79.8                 | 317.5                | 80  | 6.4           |
| AF-6*                  | 79.45                | 266.84               | 9   | 75.0                 | 202.1                | 137 | 4.0           |
| AF-8                   | 79.45                | 266.83               | 5   | 70.4                 | 282.4                | 144 | 5.2           |
| AF-10                  | 79.45                | 266.83               | 9   | 75.1                 | 303.0                | 34  | 8.0           |
| AF-12*                 | 79.45                | 266.83               | 9   | 81.9                 | 297.6                | 102 | 4.6           |
| Hassel Fm.             |                      |                      |     |                      |                      |     |               |

Table 1. continued

| <b>Expedition Fiord</b> |                      |                      |          |                      |                      |          |               |
|-------------------------|----------------------|----------------------|----------|----------------------|----------------------|----------|---------------|
| Lava Unit               | Lat. ( $^{\circ}$ N) | Lon. ( $^{\circ}$ E) | <i>N</i> | Incl. ( $^{\circ}$ ) | Decl. ( $^{\circ}$ ) | <i>k</i> | $\alpha_{95}$ |
| Kanguk Fm.              |                      |                      |          |                      |                      |          |               |
| EF-8a*                  | 79.42                | 268.49               | 3        | 81.2                 | 350.4                | 60       | 10.4          |
| EF-8b                   | 79.42                | 268.49               | 4        | 77.8                 | 312.1                | 746      | 2.6           |
| EF-7a                   | 79.42                | 268.50               | 4        | 82.7                 | 328.4                | 391      | 3.5           |
| EF-7b                   | 79.42                | 268.50               | 4        | 63.1                 | 295.2                | 290      | 4.1           |
| EF-6                    | 79.42                | 268.50               | 3        | 73.8                 | 336.8                | 240      | 5.2           |
| EF-5                    | 79.42                | 268.50               | 4        | 73.8                 | 236.8                | 863      | 2.4           |
| EF-3                    | 79.42                | 268.51               | 3        | 82.5                 | 260.0                | 112      | 7.6           |
| EF-2                    | 79.42                | 268.51               | 6        | 70.8                 | 330.9                | 163      | 4.5           |
| EF-1b                   | 79.42                | 268.51               | 3        | 84.6                 | 225.9                | 57       | 10.7          |
| Hassel Fm.              |                      |                      |          |                      |                      |          |               |
| Sills*/Christopher Fm.  |                      |                      |          |                      |                      |          |               |

Single lines represent sediments of the Bastion Ridge Formation. \* Lava used for Thellier analyses of plagioclase crystals. Incl., inclination; Decl., declination.
