# Supplementary material
Source: PubMed Central journal article supplement (PMC137829)
Supplement: pnas_222373499_2.pdf [file pnas_222373499_2.pdf]

Table 2. Paleointensity values and virtual dipole moment (VDM) calculations for plagioclase crystals based on a paleolatitude of  $71^\circ$  (calculated from the mean directions of 37 lava units)

| Unit        | $N$ | Averaged $\mu\text{T}$ | Averaged VDM, $\text{Am}^2$ | Unaveraged $\mu\text{T}$ | Unaveraged VDM, $\text{Am}^2$ |
|-------------|-----|------------------------|-----------------------------|--------------------------|-------------------------------|
| BC-1        | 5   | $88.7 \pm 6.2$         | $12.0 \pm 0.8$              | $92.8 \pm 15.0$          | $12.5 \pm 2.0$                |
| DC-10       | 8   | $89.6 \pm 2.2$         | $12.1 \pm 0.3$              | $90.2 \pm 4.5$           | $12.2 \pm 0.6$                |
| DC-15a      | 10  | $92.6 \pm 13.2$        | $12.5 \pm 1.8$              | $91.1 \pm 10.4$          | $12.3 \pm 1.4$                |
| DC-17       | 5   | $98.6 \pm 5.5$         | $13.3 \pm 0.7$              | $93.5 \pm 6.7$           | $12.6 \pm 0.9$                |
| AF-6        | 6   | $98.3 \pm 6.3$         | $13.3 \pm 0.9$              | $95.0 \pm 3.0$           | $12.8 \pm 0.4$                |
| AF-12       | 7   | $86.5 \pm 6.9$         | $11.7 \pm 0.9$              | $88.5 \pm 13.3$          | $12.0 \pm 1.8$                |
| EF-1 (sill) | 5   | $96.1 \pm 8.0$         | $13.0 \pm 1.1$              | $98.8 \pm 12.4$          | $13.3 \pm 1.7$                |
| EF-8a       | 5   | $100.2 \pm 5.4$        | $13.5 \pm 0.7$              | $101.3 \pm 2.3$          | $13.7 \pm 0.3$                |
| All         | 8   | $93.8 \pm 5.2$         | $12.7 \pm 0.7$              | $93.9 \pm 4.3$           | $12.7 \pm 0.6$                |

Errors are  $1\sigma$ .
