# Supplementary material
Source: PubMed Central journal article supplement (PMC137829)
Supplement: pnas_222373499_3.pdf [file pnas_222373499_3.pdf]

Table 3. Averaged paleointensity parameters: temperature range, paleofield value (in  $\mu\text{T}$ ), regression coefficient ( $R^2$ ), number of temperature steps (points) used in line fit ( $NP$ ), slope ( $b$ ), standard deviation of line fit ( $\sigma_b$ ), fraction of NRM used in line fit ( $f$ ), gap factor ( $g$ ), and quality factor ( $q$ ).

| Sample      | Temp., $^{\circ}\text{C}$ | $\mu\text{T}$ | $R^2$ | $NP$ | $b$    | $\sigma_b$ | $f$   | $g$   | $q$    |
|-------------|---------------------------|---------------|-------|------|--------|------------|-------|-------|--------|
| BC-1-1s1    | 325-425                   | 93.2          | 0.99  | 5    | -1.553 | 0.225      | 0.441 | 0.749 | 2.280  |
| BC-1-1s2    | 325-400                   | 80.8          | 0.98  | 4    | -1.347 | 0.188      | 0.551 | 0.653 | 2.578  |
| BC-1-1s4    | 325-425                   | 89.3          | 0.97  | 5    | -1.489 | 0.221      | 0.458 | 0.747 | 2.305  |
| BC-1-1s7    | 300-400                   | 95.9          | 0.99  | 5    | -1.593 | 0.085      | 0.437 | 0.739 | 6.052  |
| BC-1-1s12   | 275-400                   | 84.3          | 0.99  | 6    | -1.405 | 0.090      | 0.460 | 0.776 | 5.573  |
| DC-10-1s1   | 325-425                   | 90.1          | 0.99  | 5    | -1.501 | 0.217      | 0.394 | 0.497 | 1.354  |
| DC-10-1s2   | 350-450                   | 91.1          | 0.95  | 6    | -1.518 | 0.189      | 0.536 | 0.613 | 2.639  |
| DC-10-1s3   | 300-425                   | 88.5          | 0.99  | 6    | -1.475 | 0.086      | 0.390 | 0.654 | 4.386  |
| DC-10-1s5   | 300-400                   | 90.1          | 0.98  | 5    | -1.502 | 0.047      | 0.489 | 0.722 | 11.283 |
| DC-10-2s1   | 325-425                   | 92.4          | 0.99  | 5    | -1.540 | 0.062      | 0.339 | 0.658 | 5.541  |
| DC-10-2s4   | 300-400                   | 85.0          | 0.99  | 5    | -1.416 | 0.115      | 0.519 | 0.708 | 4.524  |
| DC-10-2s5   | 325-425                   | 90.3          | 0.99  | 5    | -1.505 | 0.041      | 0.566 | 0.662 | 13.754 |
| DC-10-2s6   | 350-450                   | 89.2          | 0.99  | 5    | -1.486 | 0.151      | 0.397 | 0.734 | 2.868  |
| DC-15a-1s2  | 350-450                   | 83.8          | 0.99  | 5    | -1.397 | 0.091      | 0.654 | 0.746 | 7.490  |
| DC-15a-1s3  | 300-450                   | 103.2         | 0.99  | 7    | -1.720 | 0.021      | 0.624 | 0.752 | 38.434 |
| DC-15a-2s6  | 350-475                   | 95.7          | 0.99  | 6    | -1.595 | 0.058      | 0.530 | 0.796 | 11.602 |
| DC-15a-3s2  | 300-400                   | 112.2         | 0.97  | 5    | -1.870 | 0.126      | 0.575 | 0.714 | 6.093  |
| DC-15a-3s5  | 325-425                   | 94.3          | 0.96  | 5    | -1.572 | 0.268      | 0.533 | 0.662 | 2.070  |
| DC-15a-4s2  | 350-475                   | 71.3          | 0.99  | 5    | -1.189 | 0.068      | 0.408 | 0.757 | 5.400  |
| DC-15a-4s4  | 275-425                   | 104.8         | 0.99  | 7    | -1.746 | 0.053      | 0.381 | 0.745 | 9.351  |
| DC-15a-4s8  | 325-425                   | 72.7          | 0.99  | 5    | -1.212 | 0.079      | 0.578 | 0.705 | 6.252  |
| DC-15a-4s9  | 350-450                   | 94.1          | 0.99  | 5    | -1.568 | 0.065      | 0.444 | 0.737 | 7.894  |
| DC-15a-4s10 | 325-450                   | 94.0          | 0.99  | 6    | -1.566 | 0.110      | 0.490 | 0.741 | 5.169  |
| DC-17-1s1   | 275-400                   | 97.9          | 0.95  | 6    | -1.631 | 0.261      | 0.613 | 0.748 | 2.865  |
| DC-17-1s3   | 275-475                   | 93.3          | 0.98  | 9    | -1.555 | 0.108      | 0.514 | 0.771 | 5.706  |
| DC-17-1s5   | 325-450                   | 101.1         | 0.98  | 6    | -1.684 | 0.177      | 0.507 | 0.778 | 3.753  |
| DC-17-1s7   | 325-425                   | 102.6         | 0.99  | 5    | -1.711 | 0.095      | 0.530 | 0.697 | 6.653  |
| DC-17-1s10  | 275-400                   | 102.0         | 0.99  | 6    | -1.699 | 0.054      | 0.336 | 0.789 | 8.341  |
| AF-6-1s3    | 350-450                   | 104.9         | 0.99  | 5    | -1.748 | 0.046      | 0.456 | 0.746 | 12.927 |
| AF-6-1s4    | 325-400                   | 106.3         | 0.99  | 4    | -1.771 | 0.099      | 0.493 | 0.636 | 5.609  |
| AF-6-1s6    | 350-450                   | 94.0          | 0.99  | 4    | -1.567 | 0.031      | 0.330 | 0.713 | 11.894 |
| AF-6-1s8    | 350-475                   | 98.5          | 0.99  | 5    | -1.641 | 0.063      | 0.436 | 0.782 | 8.881  |
| AF-6-1s9    | 325-425                   | 96.2          | 0.99  | 5    | -1.604 | 0.095      | 0.421 | 0.743 | 5.281  |
| AF-6-1s10   | 350-450                   | 90.0          | 0.98  | 5    | -1.501 | 0.118      | 0.467 | 0.734 | 4.360  |
| AF-12-1s1   | 275-425                   | 80.2          | 0.96  | 6    | -1.337 | 0.108      | 0.699 | 0.775 | 2.717  |
| AF-12-1s3   | 275-450                   | 82.9          | 0.99  | 5    | -1.382 | 0.038      | 0.818 | 0.832 | 24.751 |
| AF-12-1s6   | 350-450                   | 76.8          | 0.98  | 5    | -1.280 | 0.066      | 0.348 | 0.727 | 4.907  |
| AF-12-1s9   | 325-425                   | 89.6          | 0.99  | 5    | -1.493 | 0.047      | 0.489 | 0.704 | 10.936 |
| AF-12-1s10  | 350-425                   | 87.2          | 0.99  | 4    | -1.453 | 0.060      | 0.388 | 0.666 | 6.258  |
| AF-12-1s11  | 300-450                   | 90.6          | 0.99  | 6    | -1.511 | 0.048      | 0.838 | 0.819 | 21.604 |
| AF-12-1s12  | 275-425                   | 96.1          | 0.98  | 7    | -1.599 | 0.077      | 0.884 | 0.795 | 14.954 |
| EF-1-1s1    | 350-475                   | 93.2          | 0.99  | 6    | -1.554 | 0.089      | 0.664 | 0.780 | 9.043  |
| EF-1-1s3    | 325-450                   | 102.1         | 0.99  | 6    | -1.702 | 0.067      | 0.619 | 0.665 | 10.457 |
| EF-1-1s5    | 325-425                   | 83.3          | 0.99  | 6    | -1.388 | .045       | 0.790 | 0.743 | 18.105 |
| EF-1-1s8    | 325-425                   | 101.1         | 0.99  | 5    | -1.685 | 0.089      | 0.600 | 0.732 | 8.315  |
| EF-1-1s9    | 375-450                   | 100.6         | 0.99  | 4    | -1.677 | 0.104      | 0.456 | 0.499 | 3.669  |
| EF-8a-1s1   | 325-450                   | 91.7          | 0.97  | 6    | -1.529 | 0.173      | 0.470 | 0.746 | 3.099  |
| EF-8a-1s2   | 300-450                   | 102.7         | 0.99  | 7    | -1.709 | 0.043      | 0.363 | 0.669 | 9.652  |
| EF-8a-1s3   | 325-425                   | 104.7         | 0.99  | 5    | -1.745 | 0.049      | 0.786 | 0.719 | 20.126 |
| EF-8a-1s4   | 350-450                   | 98.1          | 0.99  | 5    | -1.635 | 0.097      | 0.417 | 0.662 | 4.653  |
| EF-8a-1s8   | 350-425                   | 104.0         | 0.99  | 4    | -1.733 | 0.112      | 0.471 | 0.660 | 4.810  |

See ref. 1 for further definitions.

Reference:

1. Tarduno, J.A., Cottrell, R.D. & Smirnov, A.V. (2001) *Science* **291**,1779-1783.
