# Supplementary material
Source: PubMed Central journal article supplement (PMC137829)
Supplement: pnas_222373499_4.pdf [file pnas_222373499_4.pdf]

Table 4. Unaveraged paleointensity parameters: temperature range, paleofield value (in  $\mu\text{T}$ ), regression coefficient ( $R^2$ ), number of temperature steps (points) used in line fit ( $NP$ ), slope ( $b$ ), standard deviation of line fit ( $\sigma_b$ ), fraction of NRM used in line fit ( $f$ ), gap factor ( $g$ ), and quality factor ( $q$ ).

| Sample      | Temp., $^{\circ}\text{C}$ | $\mu\text{T}$ | $R^2$ | $NP$ | $b$    | $\sigma_b$ | $f$   | $g$   | $q$    |
|-------------|---------------------------|---------------|-------|------|--------|------------|-------|-------|--------|
| BC-1-1s1    | 325-425                   | 88.8          | 0.96  | 5    | -1.480 | 0.254      | 0.435 | 0.733 | 1.858  |
| BC-1-1s2    | 325-400                   | 83.4          | 0.91  | 5    | -1.390 | 0.326      | 0.453 | 0.628 | 1.213  |
| BC-1-1s4    | 325-425                   | 119.2         | 0.90  | 5    | -1.986 | 0.551      | 0.396 | 0.734 | 1.048  |
| BC-1-1s7    | 300-400                   | 83.3          | 0.98  | 5    | -1.388 | 0.133      | 0.421 | 0.788 | 3.462  |
| BC-1-1s12   | 275-400                   | 89.2          | 0.93  | 6    | -1.486 | 0.262      | 0.512 | 0.653 | 1.896  |
| DC-10-1s1   | 325-425                   | 92.3          | 0.95  | 5    | -1.538 | 0.288      | 0.326 | 0.704 | 1.226  |
| DC-10-1s2   | 350-450                   | 93.5          | 0.89  | 5    | -1.558 | 0.204      | 0.381 | 0.584 | 1.699  |
| DC-10-1s3   | 300-425                   | 91.1          | 0.97  | 6    | -1.518 | 0.179      | 0.442 | 0.717 | 2.688  |
| DC-10-1s5   | 300-400                   | 94.2          | 0.98  | 5    | -1.570 | 0.178      | 0.363 | 0.722 | 2.312  |
| DC-10-2s1   | 325-425                   | 84.1          | 0.99  | 5    | -1.401 | 0.083      | 0.373 | 0.675 | 4.250  |
| DC-10-2s4   | 300-400                   | 84.0          | 0.89  | 5    | -1.407 | 0.401      | 0.449 | 0.642 | 1.011  |
| DC-10-2s5   | 325-425                   | 87.2          | 0.99  | 5    | -1.453 | 0.113      | 0.448 | 0.413 | 2.379  |
| DC-10-2s6   | 350-450                   | 95.1          | 0.95  | 5    | -1.585 | 0.222      | 0.421 | 0.708 | 2.128  |
| DC-15a-1s2  | 350-450                   | 95.7          | 0.97  | 5    | -1.595 | 0.190      | 0.635 | 0.621 | 3.310  |
| DC-15a-1s3  | 300-450                   | 97.1          | 0.99  | 7    | -1.618 | 0.040      | 0.575 | 0.520 | 12.095 |
| DC-15a-2s6  | 350-475                   | 88.5          | 0.97  | 6    | -1.475 | 0.162      | 0.585 | 0.792 | 4.218  |
| DC-15a-3s2  | 300-400                   | 95.5          | 0.97  | 5    | -1.591 | 0.218      | 0.677 | 0.639 | 3.157  |
| DC-15a-3s5  | 325-425                   | 89.3          | 0.95  | 5    | -1.488 | 0.230      | 0.378 | 0.697 | 1.705  |
| DC-15a-4s2  | 350-475                   | 76.2          | 0.93  | 5    | -1.270 | 0.213      | 0.583 | 0.663 | 2.305  |
| DC-15a-4s4  | 275-425                   | 108.4         | 0.98  | 7    | -1.807 | 0.139      | 0.293 | 0.721 | 2.488  |
| DC-15a-4s8  | 325-425                   | 75.2          | 0.90  | 5    | -1.244 | 0.332      | 0.491 | 0.549 | 1.010  |
| DC-15a-4s9  | 350-450                   | 85.0          | 0.93  | 5    | -1.425 | 0.312      | 0.466 | 0.426 | 0.907  |
| DC-15a-4s10 | 325-450                   | 100           | 0.97  | 6    | -1.671 | 0.203      | 0.408 | 0.418 | 1.404  |
| DC-17-1s1   | 275-400                   | 84.6          | 0.83  | 6    | -1.411 | 0.473      | 0.517 | 0.346 | 0.488  |
| DC-17-1s3   | 275-475                   | 93.3          | 0.98  | 9    | -1.555 | 0.108      | 0.514 | 0.771 | 5.706  |
| DC-17-2s5   | 325-450                   | 103.1         | 0.98  | 6    | -1.719 | 0.187      | 0.464 | 0.740 | 3.156  |
| DC-17-2s7   | 325-425                   | 91.4          | 0.81  | 5    | -1.523 | 0.384      | 0.530 | 0.565 | 1.188  |
| DC-17-2s10  | 275-400                   | 95.1          | 0.95  | 6    | -1.585 | 0.164      | 0.322 | 0.642 | 1.998  |
| AF-6-1s3    | 350-450                   | 95.8          | 0.93  | 5    | -1.597 | 0.214      | 0.566 | 0.519 | 2.192  |
| AF-6-1s4    | 325-400                   | 97.2          | 0.98  | 4    | -1.620 | 0.128      | 0.524 | 0.456 | 3.024  |
| AF-6-1s6    | 350-450                   | 99.3          | 0.99  | 5    | -1.655 | 0.098      | 0.309 | 0.592 | 3.089  |
| AF-6-1s8    | 350-475                   | 93.0          | 0.97  | 6    | -1.551 | 0.126      | 0.459 | 0.652 | 3.684  |
| AF-6-1s9    | 325-425                   | 92.8          | 0.90  | 7    | -1.547 | 0.259      | 0.330 | 0.396 | 0.781  |
| AF-6-1s10   | 350-450                   | 91.7          | 0.94  | 5    | -1.528 | 0.184      | 0.548 | 0.680 | 3.095  |
| AF-12-1s1   | 275-425                   | 88.0          | 0.87  | 8    | -1.467 | 0.208      | 0.757 | 0.686 | 3.663  |
| AF-12-1s3   | 275-450                   | 83.9          | 0.97  | 9    | -1.398 | 0.089      | 0.754 | 0.716 | 8.480  |
| AF-12-1s6   | 350-450                   | 85.5          | 0.89  | 5    | -1.430 | 0.166      | 0.322 | 0.585 | 1.622  |
| AF-12-1s9   | 325-425                   | 89.6          | 0.99  | 5    | -1.493 | 0.047      | 0.489 | 0.704 | 10.936 |
| AF-12-1s10  | 350-425                   | 115.5         | 0.85  | 4    | -1.926 | 0.512      | 0.267 | 0.401 | 0.403  |
| AF-12-1s11  | 300-450                   | 71.2          | 0.88  | 6    | -1.186 | 0.190      | 0.616 | 0.609 | 2.342  |
| AF-12-1s12  | 275-425                   | 86.0          | 0.96  | 6    | -1.434 | 0.110      | 0.715 | 0.732 | 6.823  |
| EF-1-1s1    | 350-475                   | 86.2          | 0.99  | 6    | -1.436 | 0.123      | 0.663 | 0.782 | 6.053  |
| EF-1-1s3    | 325-450                   | 115.1         | 0.99  | 6    | -1.918 | 0.087      | 0.768 | 0.507 | 8.584  |
| EF-1-1s5    | 325-425                   | 89.5          | 0.98  | 5    | -1.492 | .122       | 0.569 | 0.654 | 4.767  |
| EF-1-1s8    | 325-425                   | 95.1          | 0.91  | 5    | -1.585 | 0.373      | 0.549 | 0.676 | 1.577  |
| EF-1-1s9    | 375-450                   | 108.2         | 0.99  | 4    | -1.803 | 0.150      | 0.429 | 0.623 | 3.213  |
| EF-8a-1s1   | 325-450                   | 100.7         | 0.89  | 6    | -1.679 | 0.423      | 0.533 | 0.616 | 1.303  |
| EF-8a-1s2   | 300-450                   | 104.6         | 0.99  | 7    | -1.744 | 0.100      | 0.351 | 0.561 | 3.434  |
| EF-8a-1s3   | 325-425                   | 101.2         | 0.96  | 5    | -1.686 | 0.295      | 0.626 | 0.684 | 2.447  |
| EF-8a-1s4   | 350-450                   | 101.8         | 0.99  | 5    | -1.696 | 0.169      | 0.434 | 0.695 | 3.027  |
| EF-8a-1s8   | 350-425                   | 98.1          | 0.99  | 4    | -1.634 | 0.194      | 0.387 | 0.710 | 2.314  |

See ref. 1 for further definitions.

Reference:

1. Tarduno, J.A., Cottrell, R.D. & Smirnov, A.V. (2001) *Science* **291**,1779-1783.
